# Supplementary material for: Fungistatic Effect of Phthalide Lactones on Rhodotorula mucilaginosa
Source: MDPI journal article supplement (doi:10.3390/molecules28145423), 2023-07-15
Supplement: s1 [file s1]

# Fungistatic effect of phthalide lactones on *Rhodotorula mucilaginosa*

Joanna Gach<sup>1\*</sup>, Teresa Olejniczak<sup>1\*</sup>, Jakub Pannek<sup>1</sup> and Filip Boratyński<sup>1</sup>

<sup>1</sup> Department of Food Chemistry and Biocatalysis, Wrocław University of Environmental and Life Sciences, Norwida 25, 50-375 Wrocław, Poland; jpannek@gmail.com (J.P.), filip.boratyński@upwr.edu.pl (F.B.)

\* Correspondence: joanna.gach@upwr.edu.pl (J.G.), teresa.olejniczak@upwr.edu.pl (T.O.)

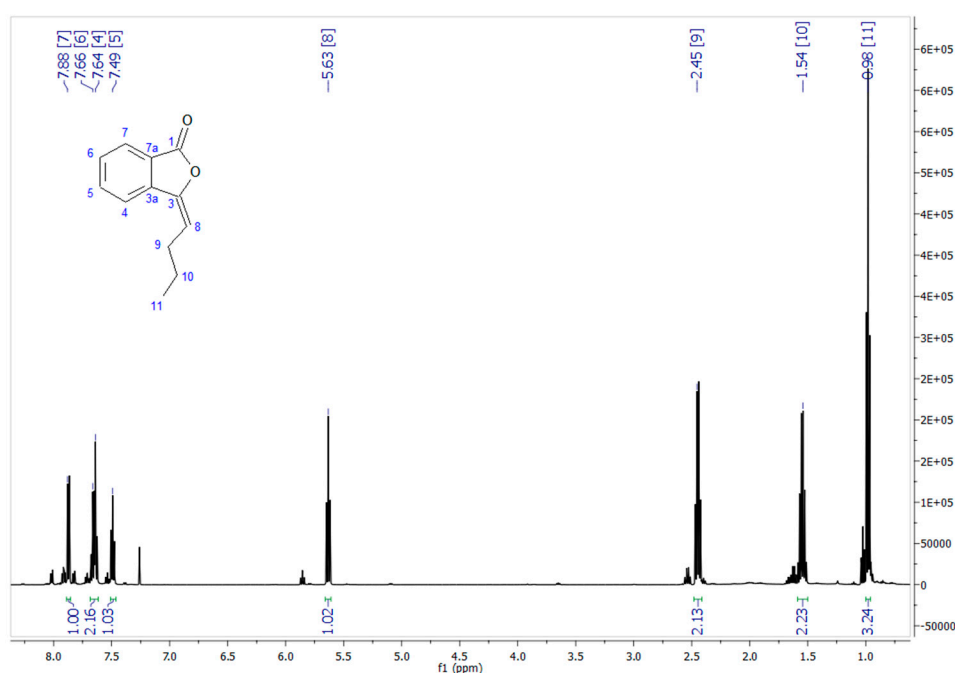

Figure S1a. <sup>1</sup>H NMR of 3-*n*-butyldenephthalide (1).

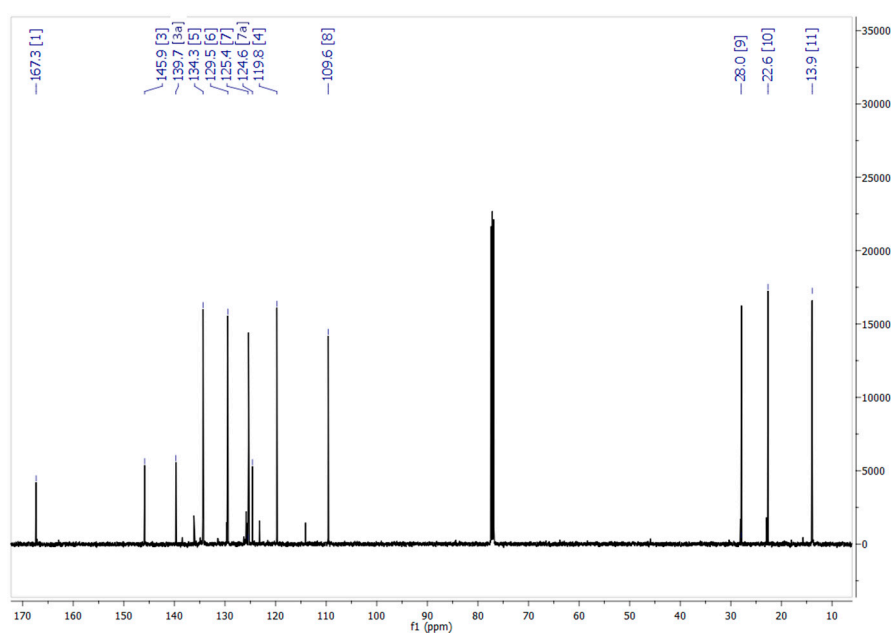

Figure S1b. <sup>13</sup>C NMR of 3-*n*-butyldenephthalide (1).

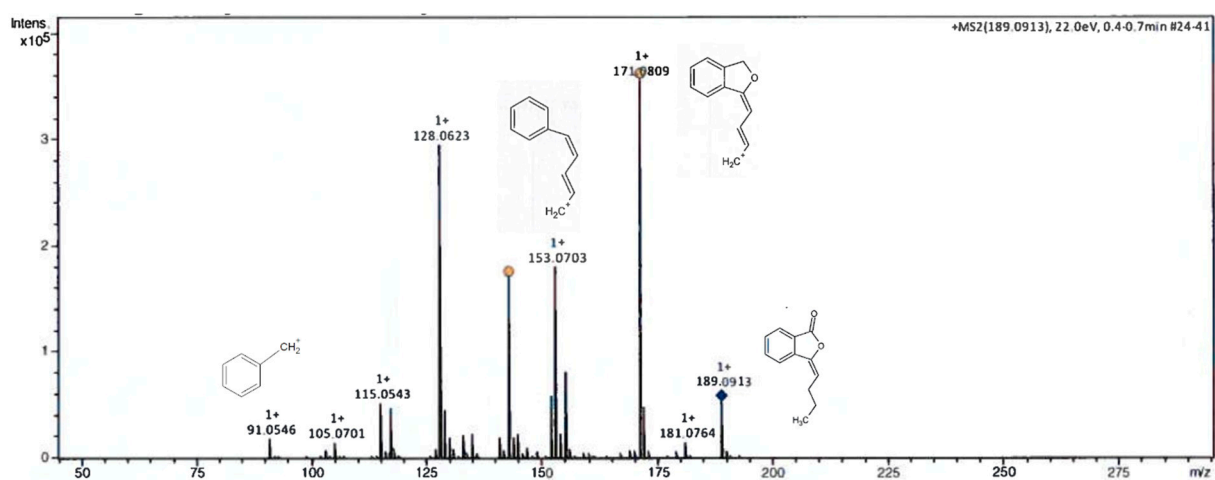

Figure S1c. HR-ESI-MS/MS of 3-*n*-butylidenephthalide (1).

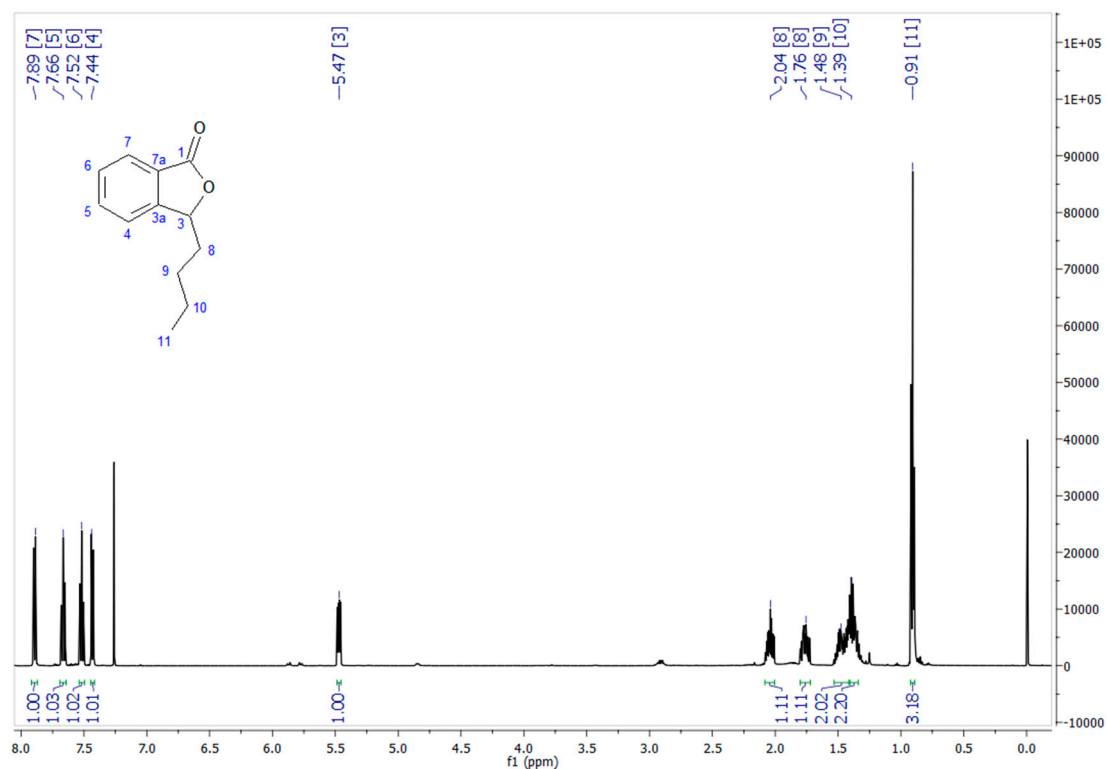

Figure S2a. <sup>1</sup>H NMR of 3-*n*-butylphthalide (2).

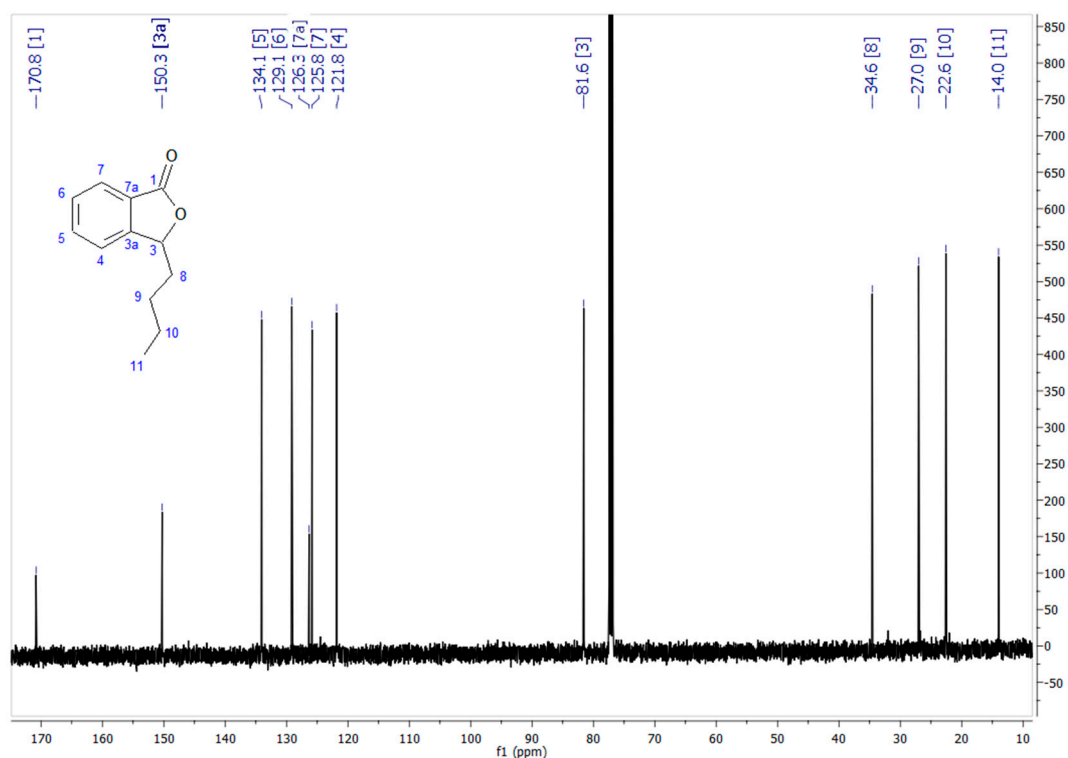

Figure S2b. <sup>13</sup>C NMR of 3-*n*-butylphthalide (2).

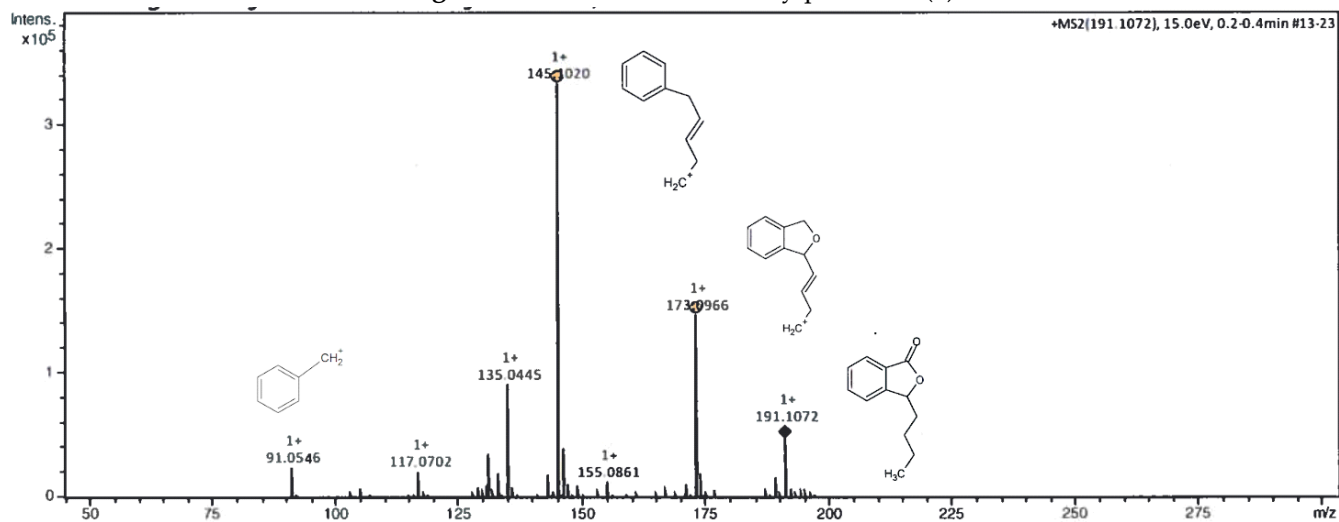

Figure S2c HR-ESI-MS/MS of 3-*n*-butylphthalide (2).

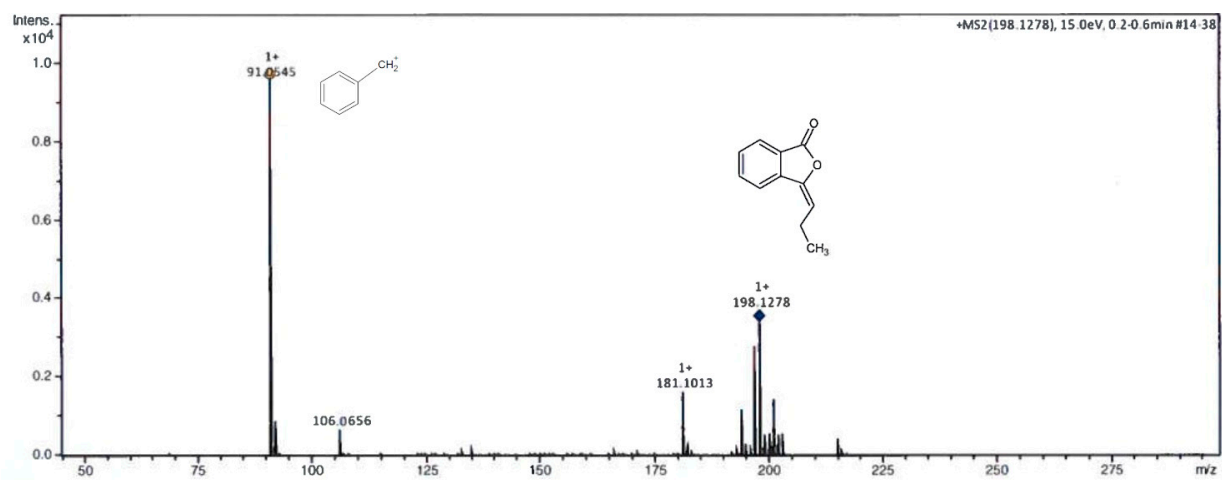

**Figure S3** HR-ESI-MS/MS of 3-*n*-propyldenephthalide (3).

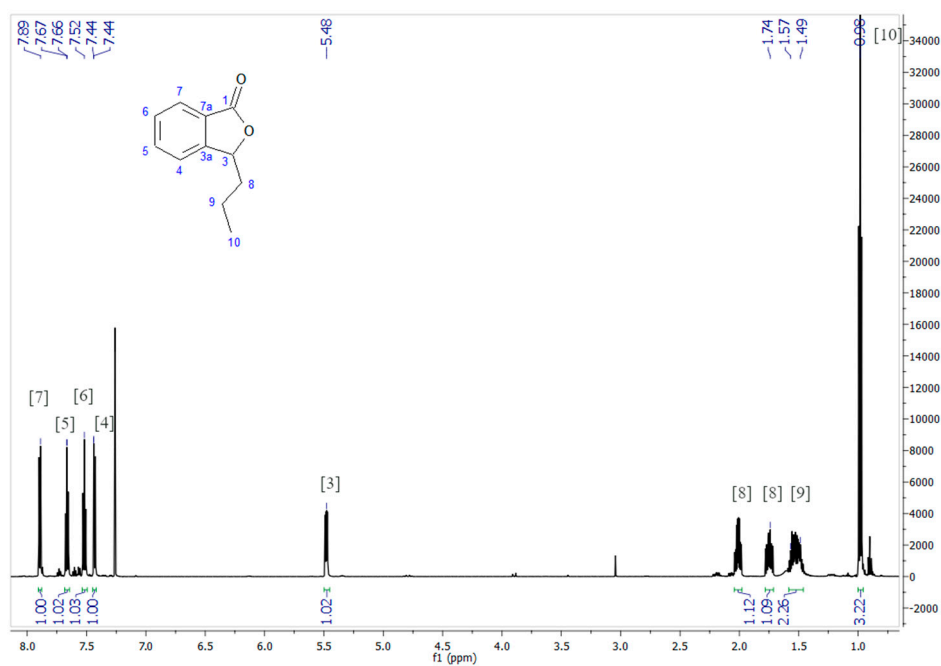

Figure S4a <sup>1</sup>H NMR of 3-*n*-propylphthalide (4).

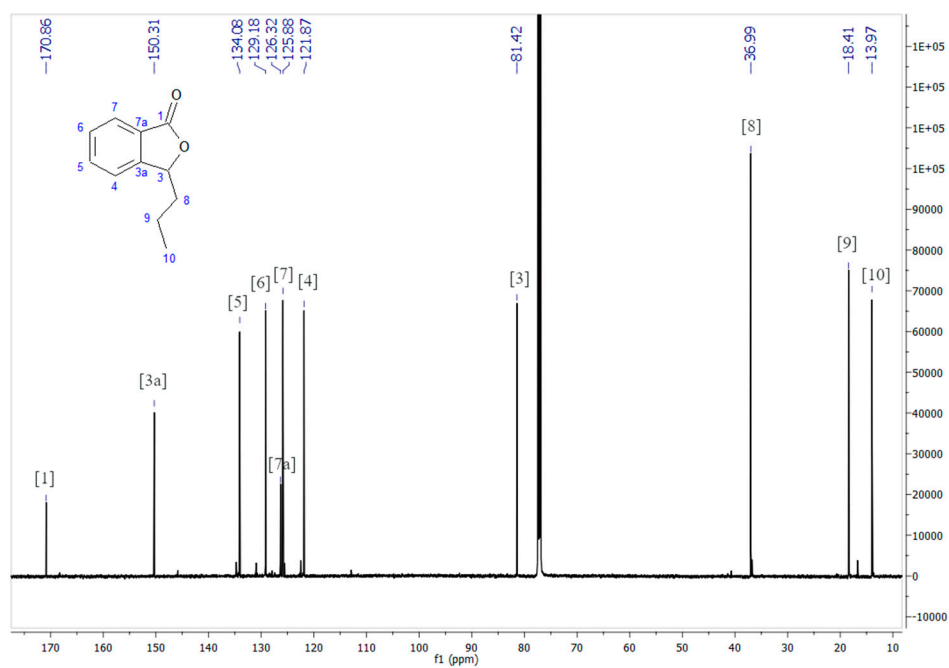

Figure S4b <sup>13</sup>C NMR of 3-*n*-propylphthalide (4).

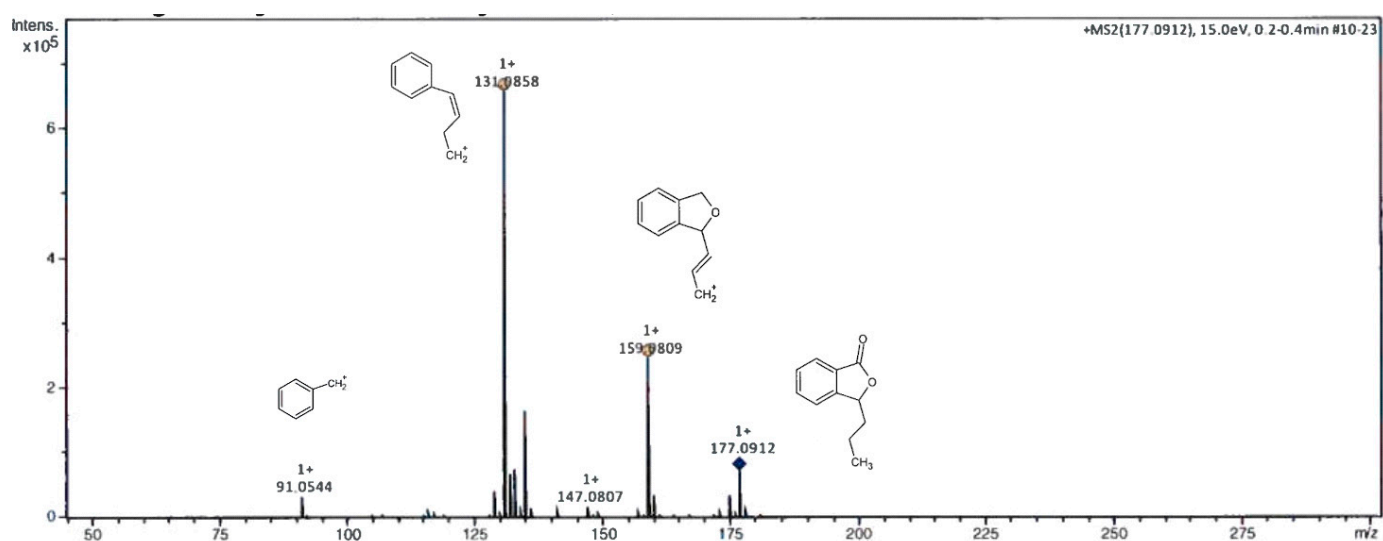

Figure S4c HR-ESI-MS/MS of 3-*n*-propylphthalide (4).

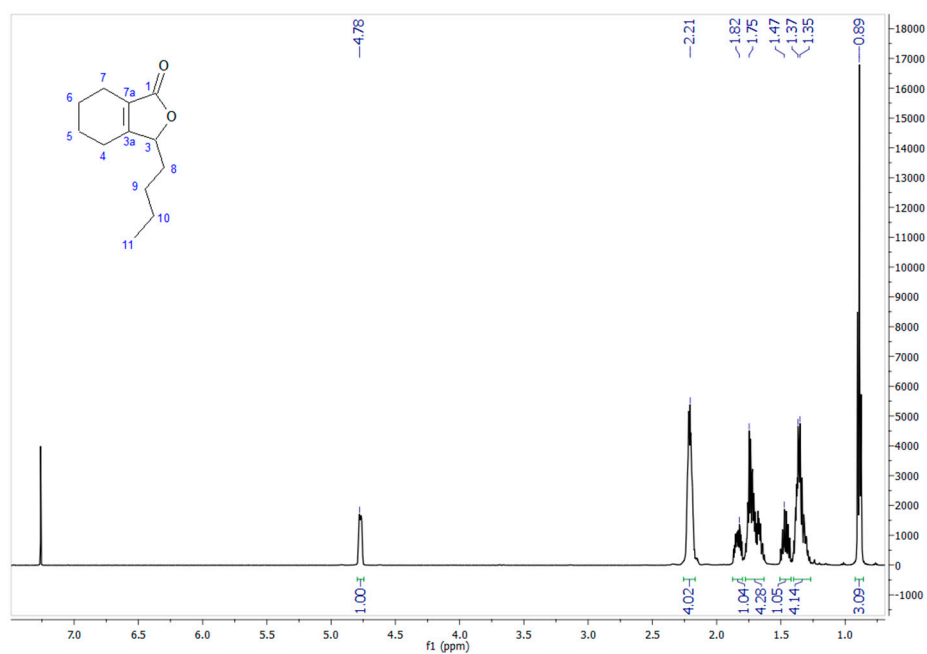

Figure S5a.  $^1\text{H}$  NMR of 3-butyl-4,5,6,7-tetrahydrophthalide (5).

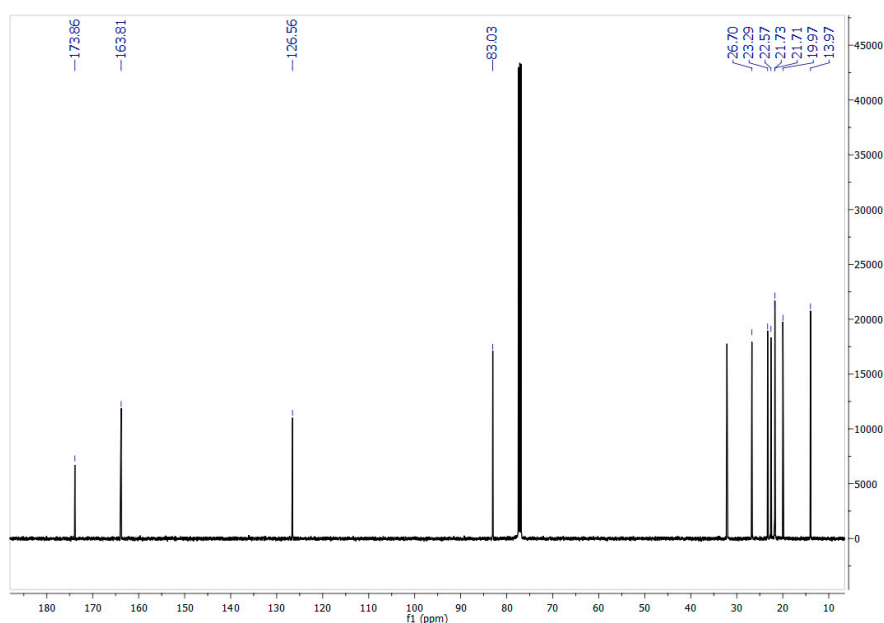

Figure S5b. <sup>13</sup>C NMR of 3-Butyl-4,5,6,7-tetrahydrophthalide (5).

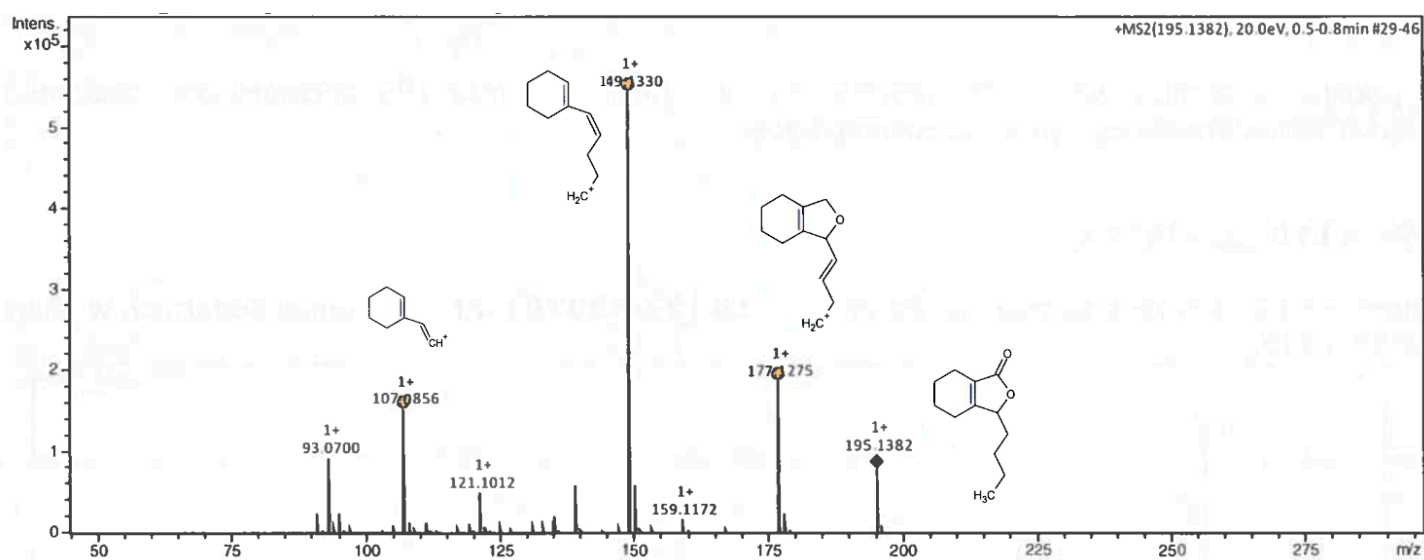

Figure S5c. HR-ESI-MS/MS of 3-Butyl-4,5,6,7-tetrahydrophthalide (5).

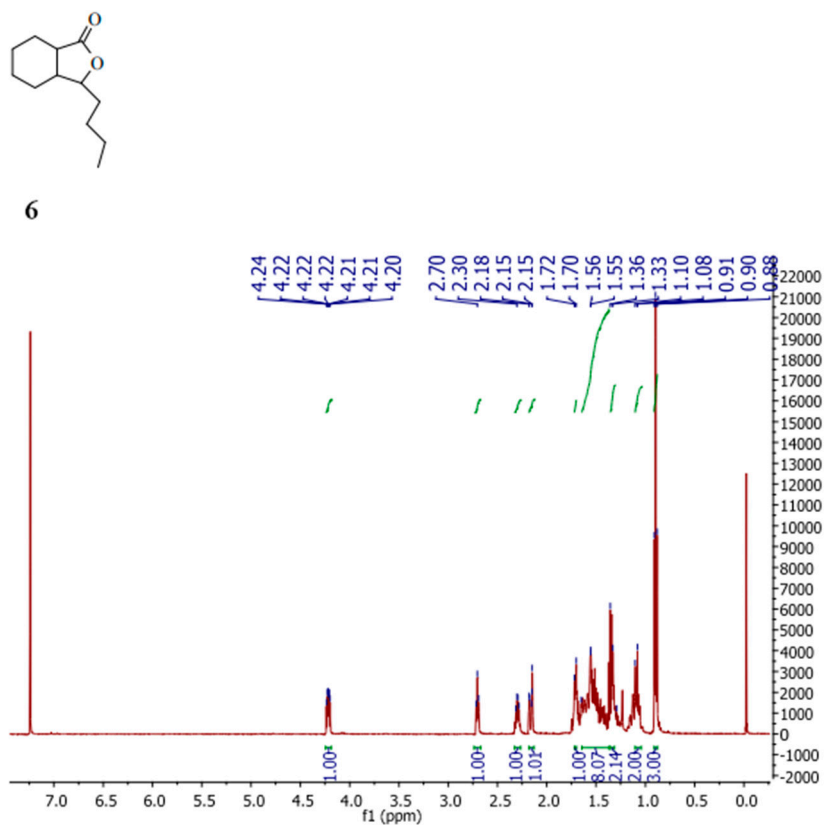

**Figure S6a.** <sup>1</sup>H NMR of 3-*n*-butyl-hexahydrophthalide (6).

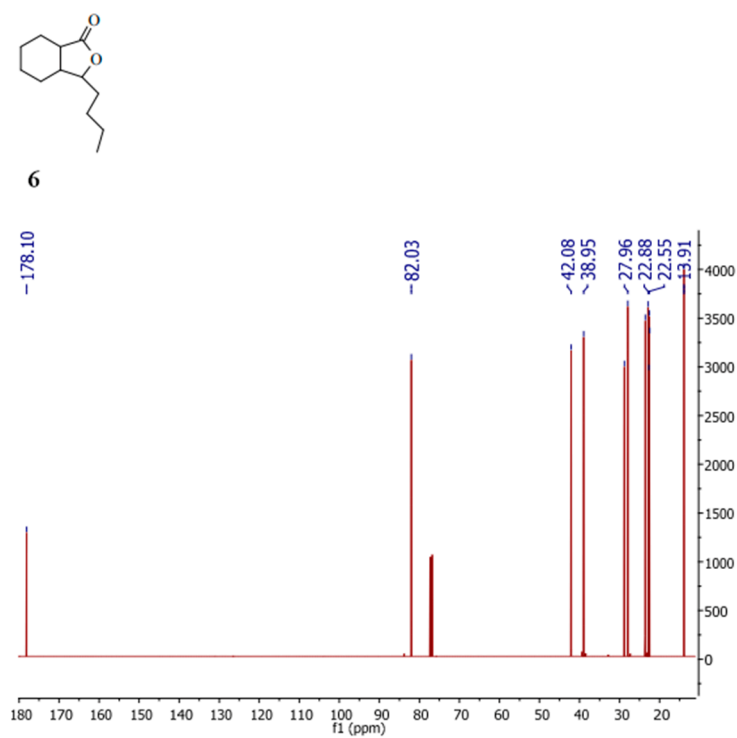

**Figure S6b.** <sup>13</sup>C NMR of 3-*n*-butyl-hexahydrophthalide (6).



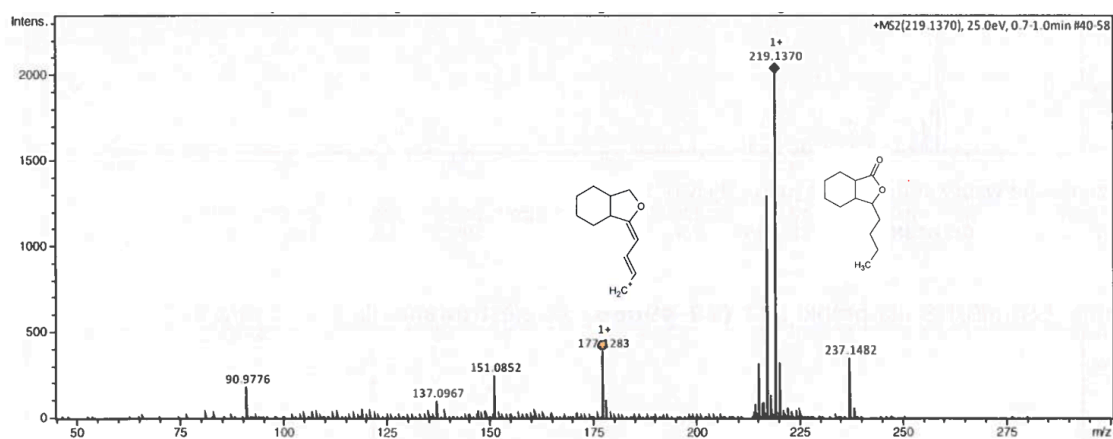

**Figure S6c.** HR-ESI-MS/MS of 3-*n*-butyl-hexahydrophthalide (6).

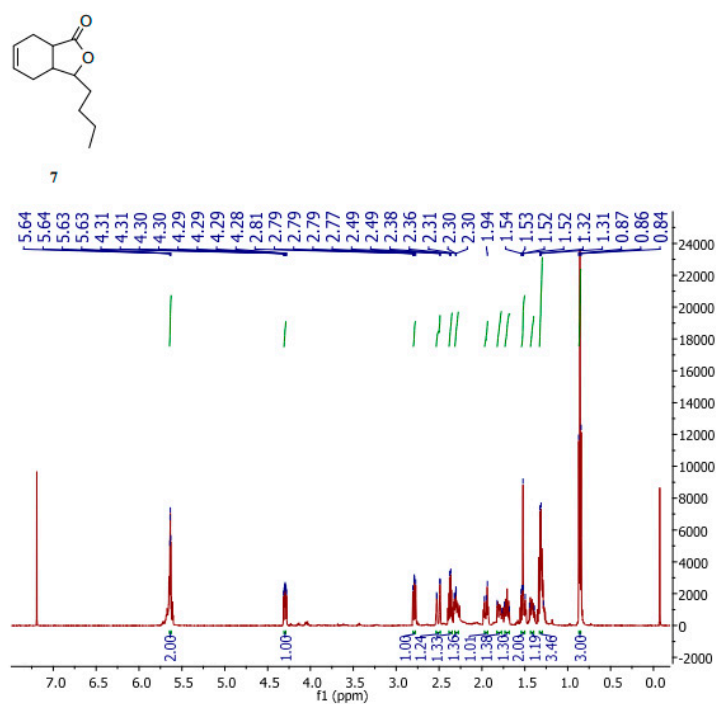

Figure S7a.  $^1\text{H}$  NMR of 3-*n*-butyl-1,2,6,7-tetrahydrophthalide (7).

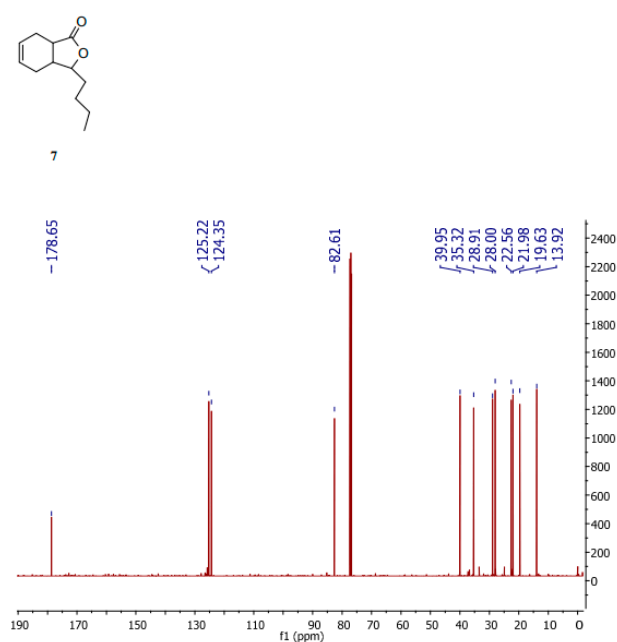

Figure S7b.  $^{13}\text{C}$  NMR of 3-*n*-butyl-1,2,6,7-tetrahydrophthalide (7).

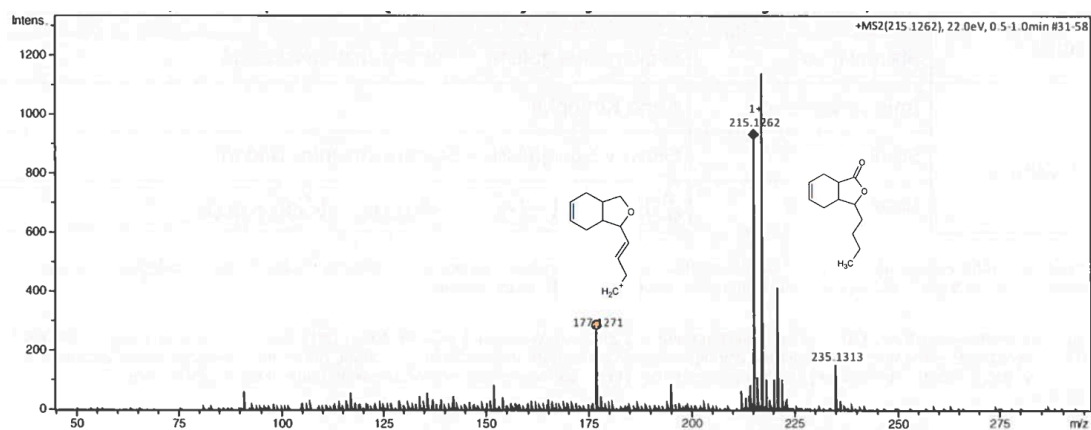

**Figure S7c.** HR-ESI-MS/MS of 3-*n*-Butyl-1,2,6,7-tetrahydrophthalide (7).
